# Supplementary material for: Heteroleptic binuclear palladium(ii) and platinum(ii) complexes containing 1,2-bis(diphenylphosphino)acetylene and 1,2-benzenedithiolates: syntheses, crystal structures, electrochemistry and photoluminescence properties
Source: Royal Society of Chemistry journal article supplement (doi:10.1039/b815013c), 2009-01-01

## SUPPLEMENTARY INFORMATION

for

Heteroleptic binuclear palladium(II) and platinum(II) complexes  
containing 1,2-bis(diphenylphosphino)acetylene and 1,2-benzenedithiolates:  
syntheses, X-ray crystal structures, electrochemistry and  
photoluminescence properties

**Kyong-Soon Shin,<sup>a</sup> Kyung-In Son,<sup>a</sup> Jae Il Kim,<sup>b</sup> Chang Seop Hong,<sup>b</sup>**

**Myungkoo Suh<sup>c</sup> and Dong-Youn Noh<sup>a,\*</sup>**

<sup>a</sup> *Department of Chemistry, Seoul Women's University, Seoul 139-774, Korea*

<sup>b</sup> *Department of Chemistry, Korea University, Seoul 136-701, Korea*

<sup>c</sup> *Department of Chemistry, Sungkyunkwan University, Suwon 440-746, Korea*

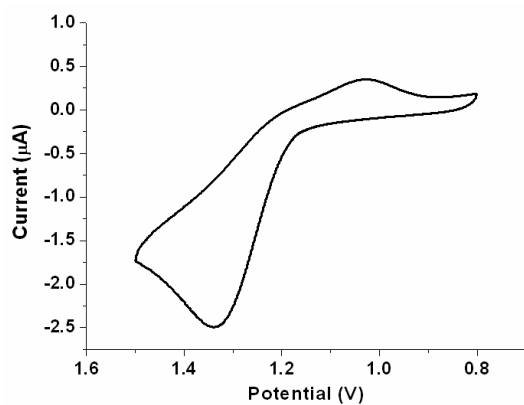

**Fig. S1** The cyclic voltammogram of complex **2**.

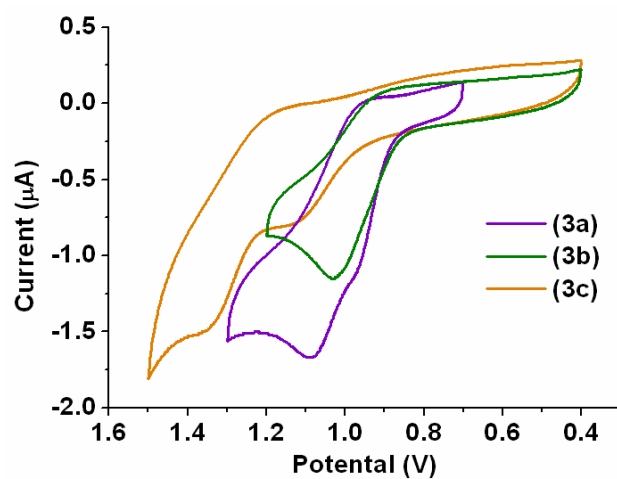

**Fig. S2** The cyclic voltammograms of complexes **3a**, **3b** and **3c**.

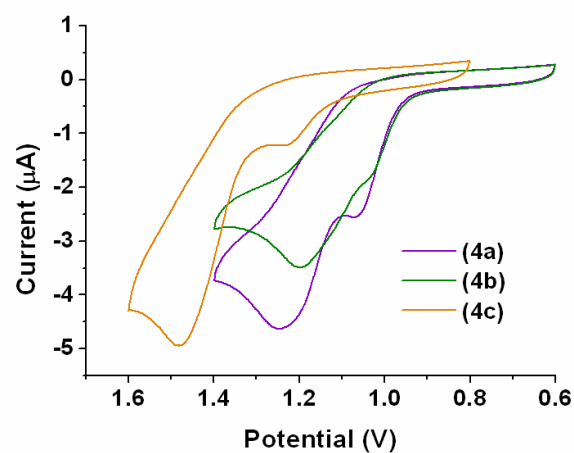

**Fig. S3** The cyclic voltammograms of complexes **4a**, **4b** and **4c**.

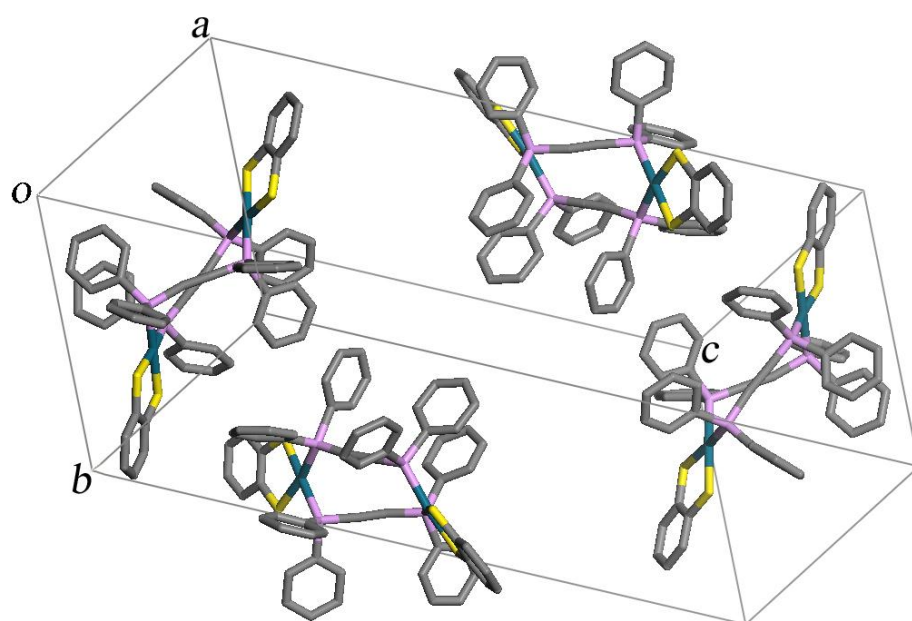

**Fig. S4** Crystal packing diagram of  $[\text{Pd}(\text{bdt})]_2(\mu\text{-Ph}_2\text{PC}\equiv\text{CPh}_2)_2$  (**3a**), showing the two sets of racemic isomers. Solvent molecules and hydrogen atoms are omitted for clarity.

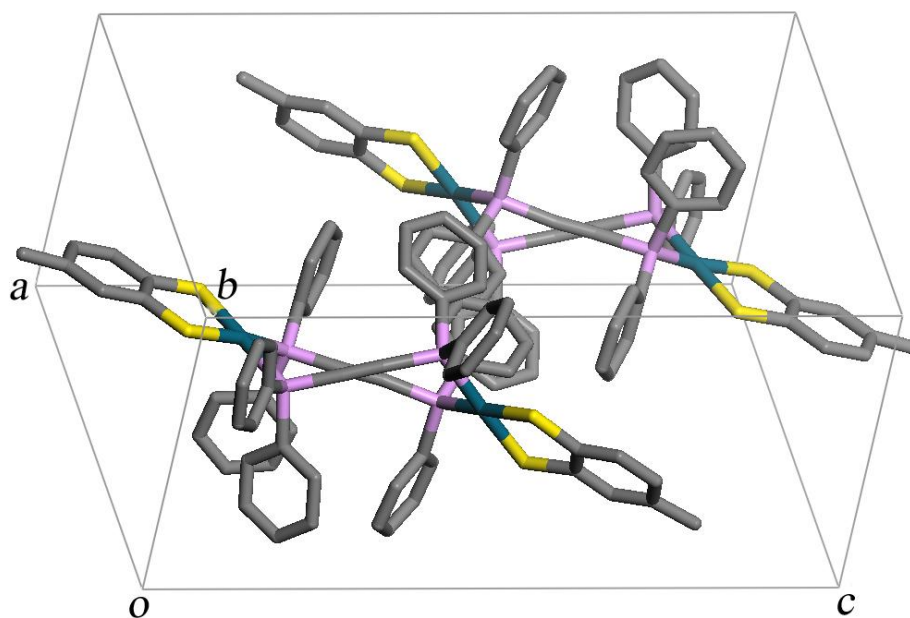

**Fig. S5** Crystal packing diagram of  $[\text{Pd}(\text{tdt})]_2(\mu\text{-Ph}_2\text{PC}\equiv\text{CPh}_2)_2$  (**3b**), showing the two racemic isomers. Hydrogen atoms are omitted for clarity.

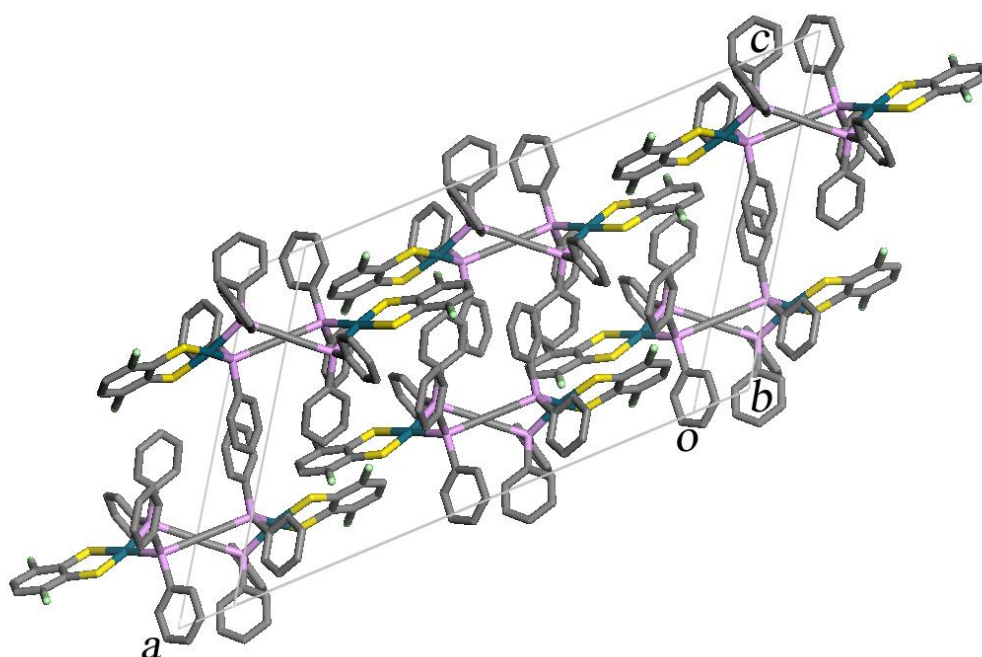

**Fig. S6** Crystal packing diagram of  $[\text{Pd}(\text{Cl}_2\text{bdt})]_2(\mu\text{-Ph}_2\text{PC}\equiv\text{CPh}_2)_2$  (**3c**), showing the two racemic isomers. Hydrogen atoms are omitted for clarity.

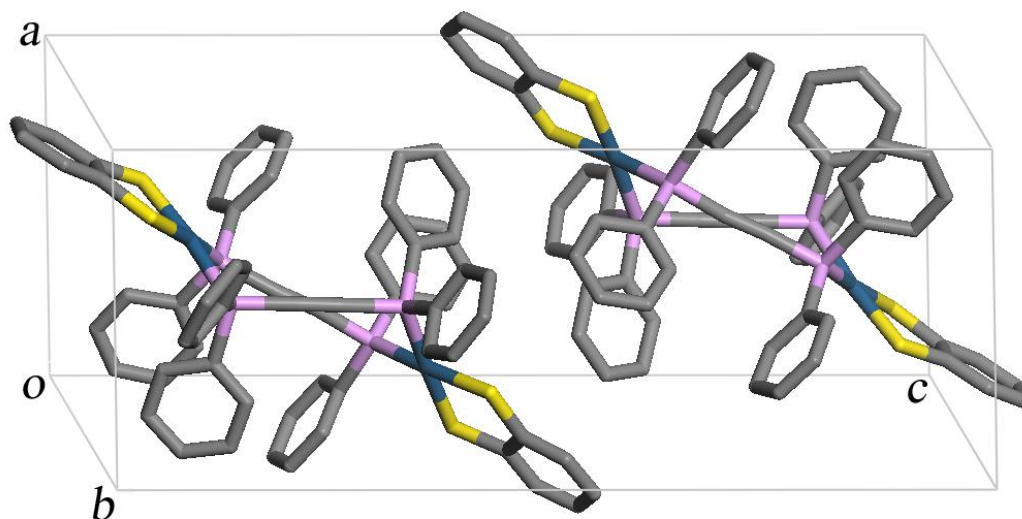

**Fig. S7** Crystal packing diagram of  $[\text{Pt}(\text{bdt})]_2(\mu\text{-Ph}_2\text{PC}\equiv\text{CPh}_2)_2$  (**4a**), showing the two racemic isomers. Solvent molecules and hydrogen atoms are omitted for clarity.

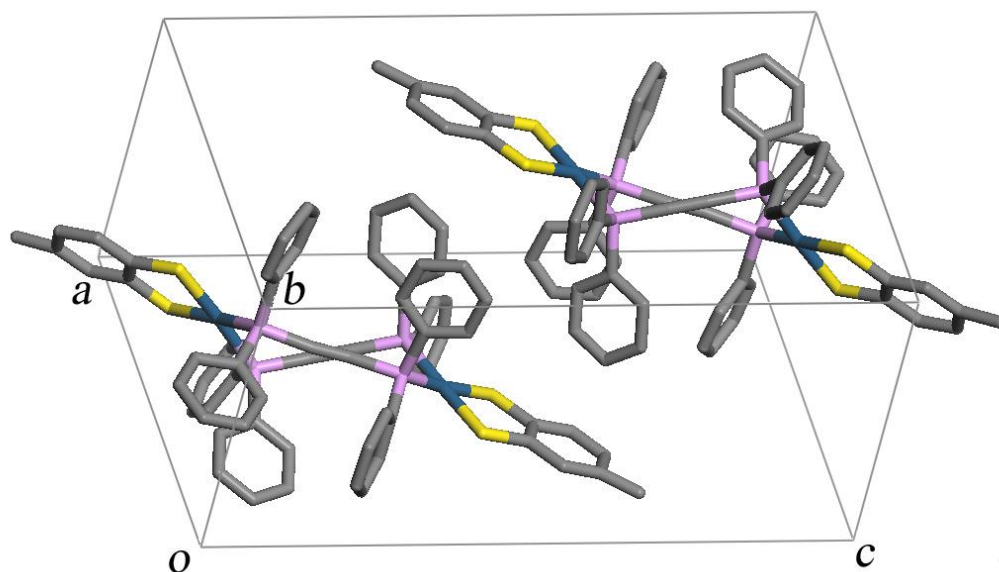

**Fig. S8** Crystal packing diagram of [Pt(tdt)]<sub>2</sub>(μ-Ph<sub>2</sub>PC≡CPh<sub>2</sub>)<sub>2</sub> (**4b**), showing the two racemic isomers. Solvent molecules and hydrogen atoms are omitted for clarity.

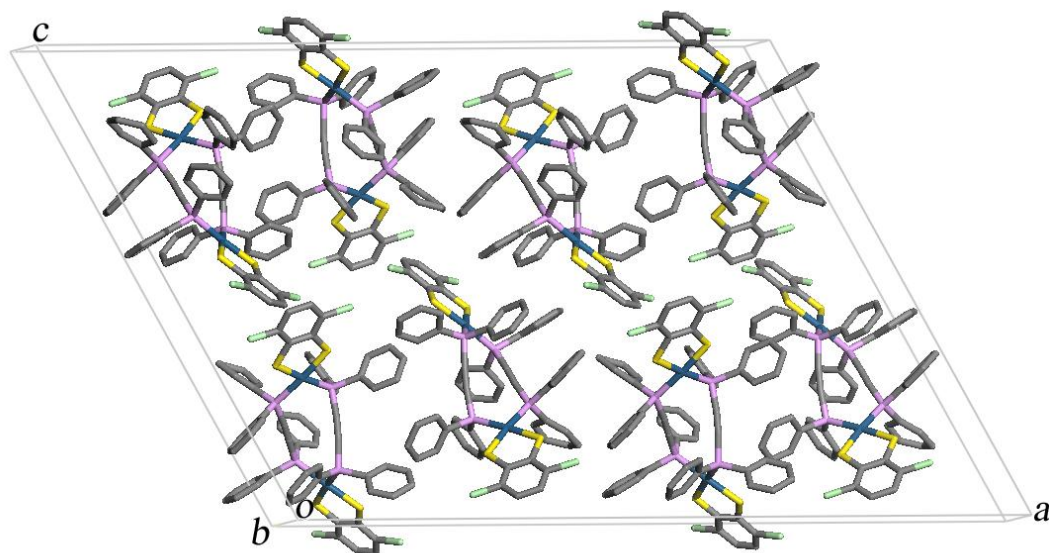

**Fig. S9** Crystal packing diagram of [Pt(Cl<sub>2</sub>bdt)]<sub>2</sub>(μ-Ph<sub>2</sub>PC≡CPh<sub>2</sub>)<sub>2</sub> (**4c**), showing the two racemic isomers. Solvent molecules, hydrogen atoms and disordered phenyl groups are omitted for clarity.

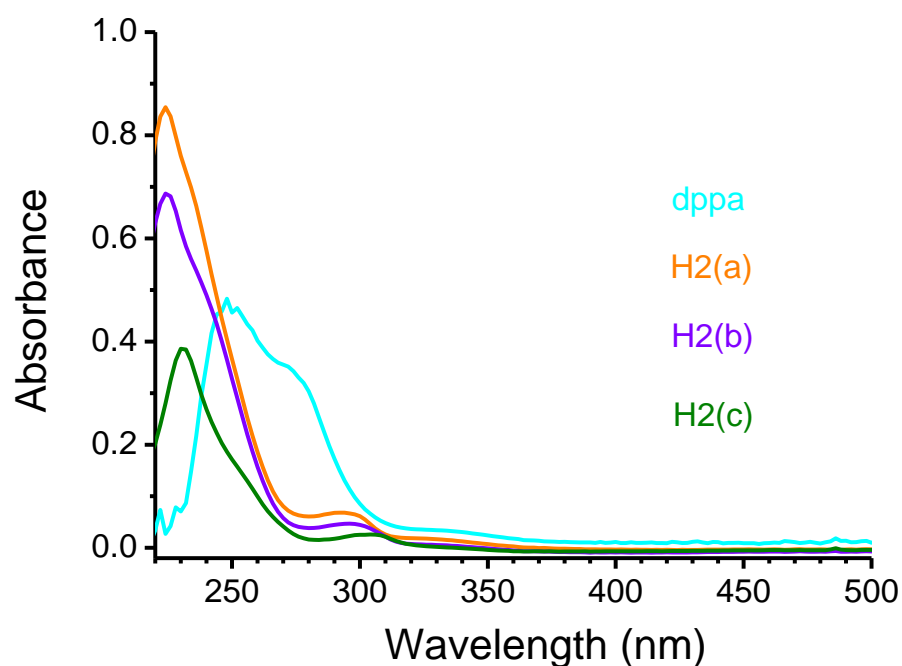

**Fig. S10** UV-Vis spectra of ligands **dppa** (248, 270, 332 nm), **H<sub>2</sub>(a)** (224, 292 nm), **H<sub>2</sub>(b)** (224, 296 nm) and **H<sub>2</sub>(c)** (230, 304 nm).

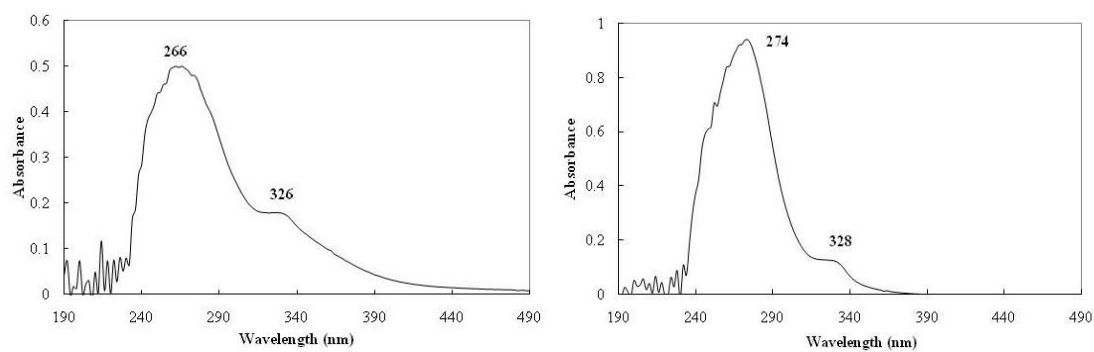

**Fig. S11** UV-Vis spectra of complexes **1** (left: 266, 326 nm) and **2** (right: 274, 328 nm).

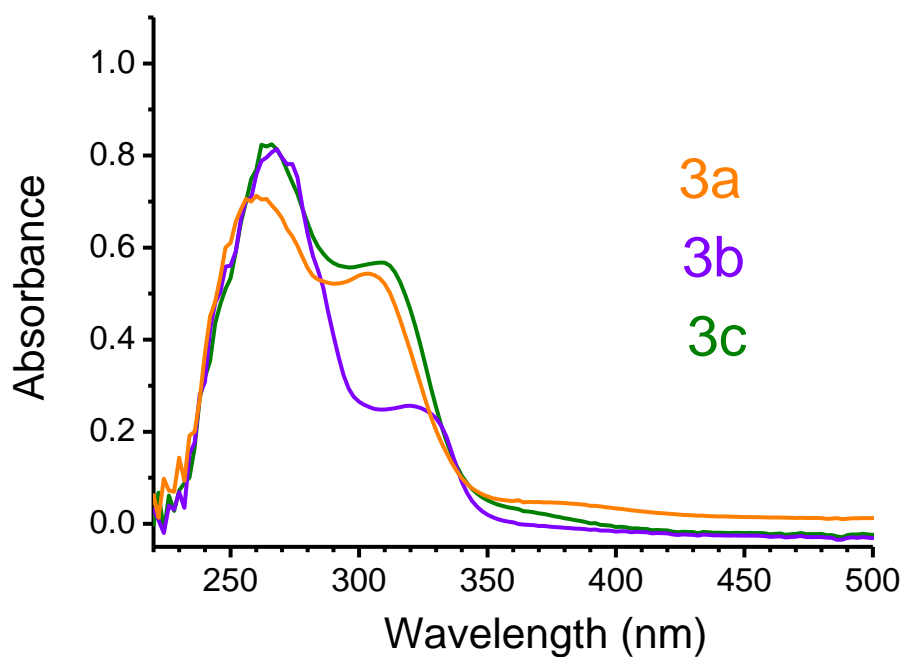

**Fig. S12** UV-Vis spectra of complexes **3a** (260, 304 nm), **3b** (268, 320 nm) and **3c** (266, 308 nm).

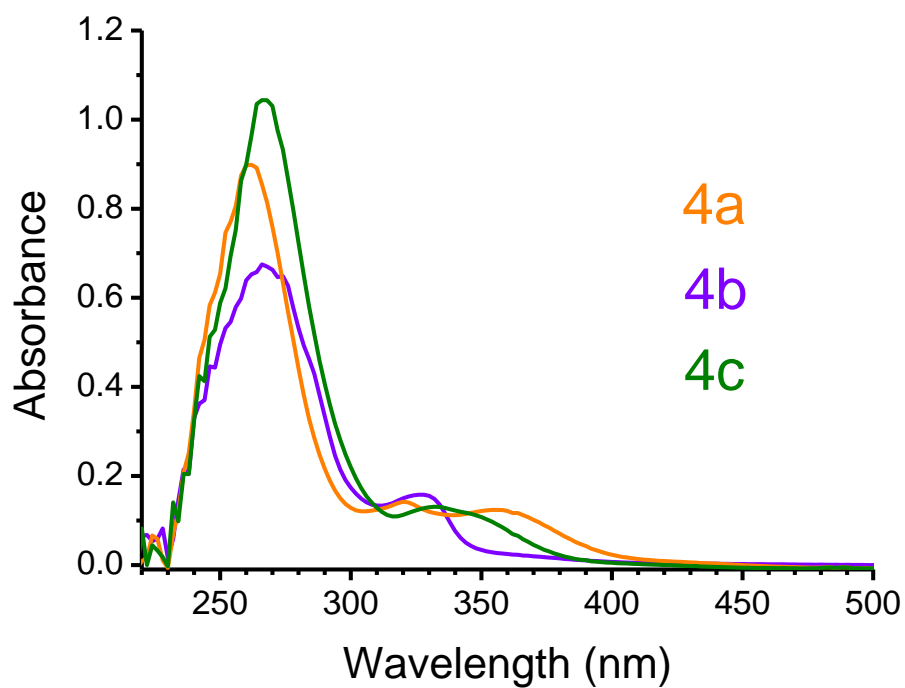

**Fig. S13** UV-Vis spectra of complexes **4a** (262, 320, 356 nm), **4b** (266, 326, 358 nm) and **4c** (266, 322, 348 nm).

**Fig. S14**  $^{31}\text{P}$  NMR spectra of Pd(II) complexes (**1** and **3**).

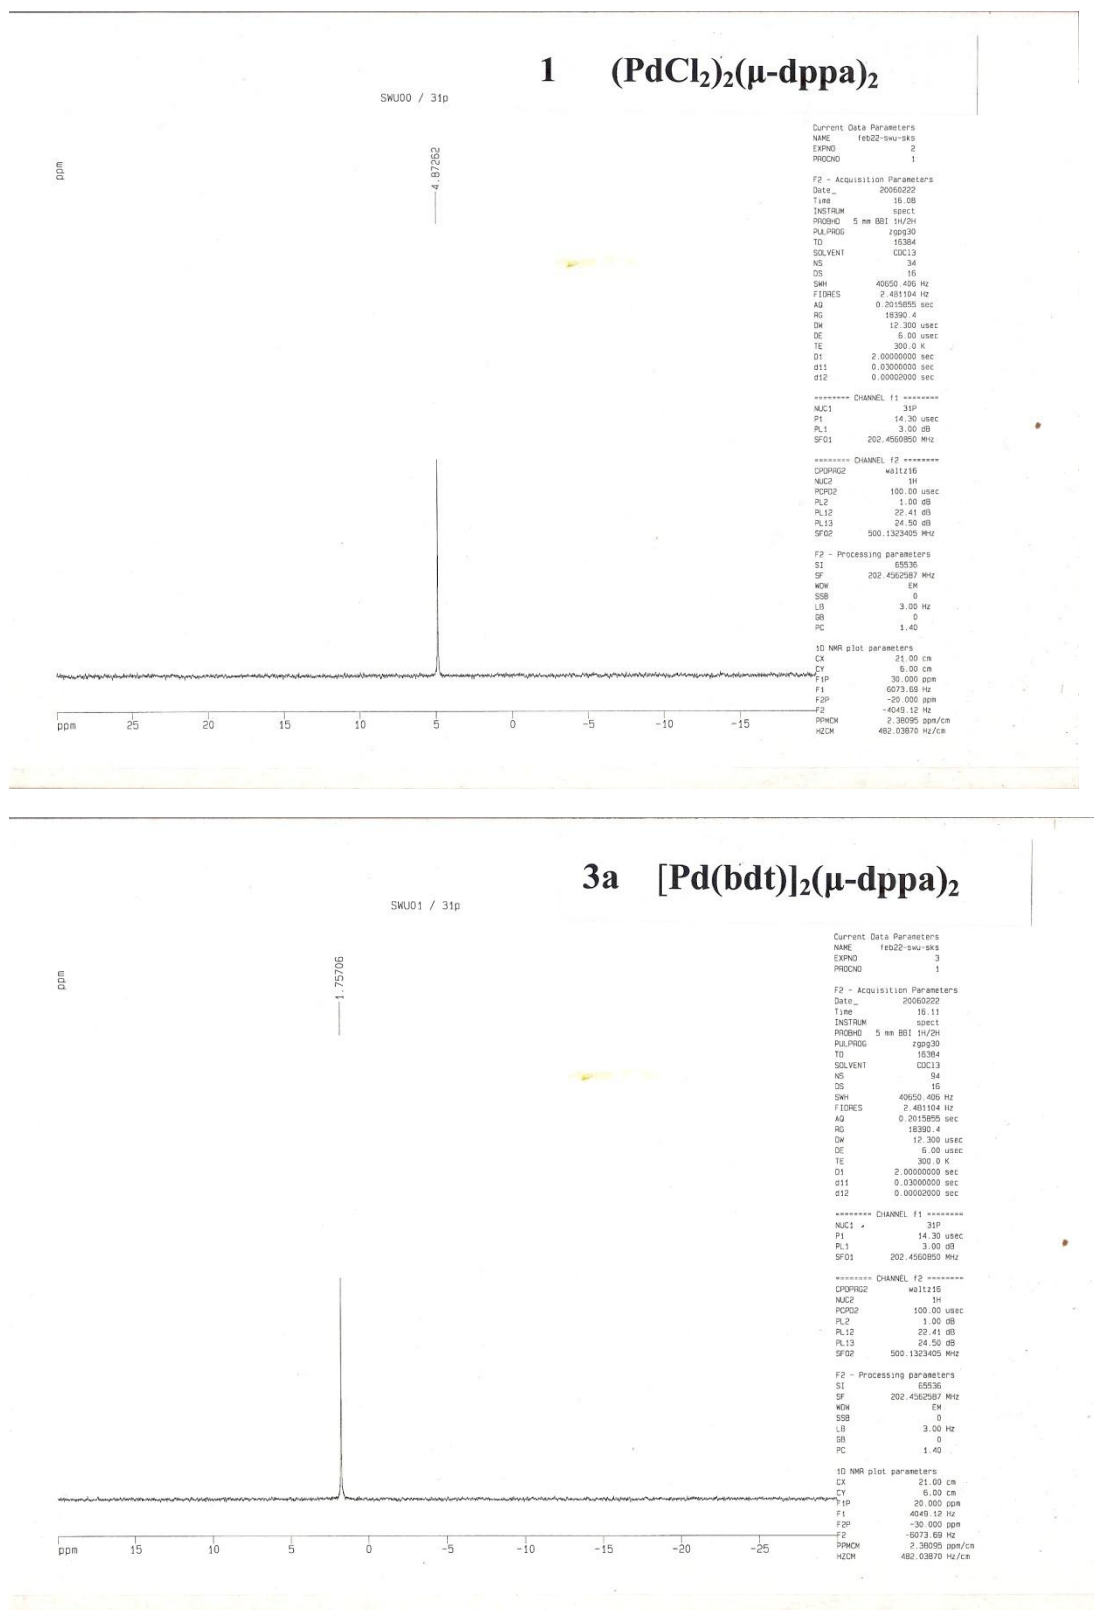



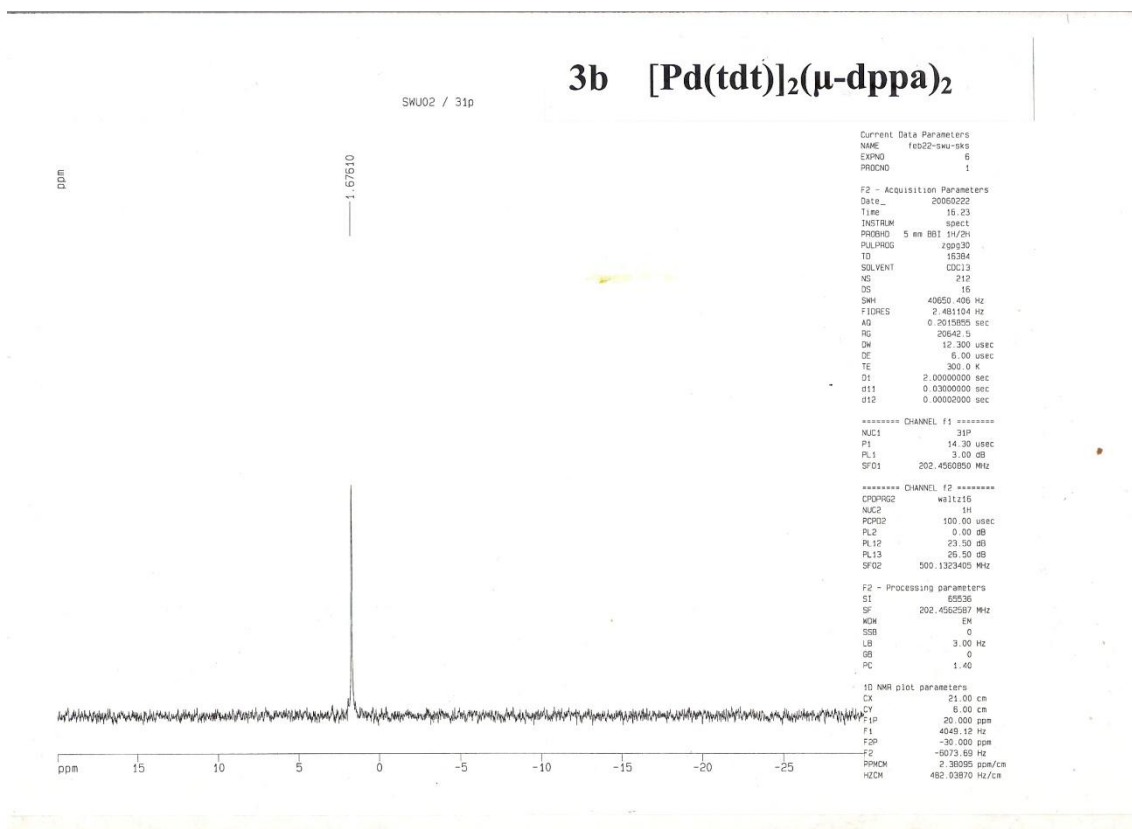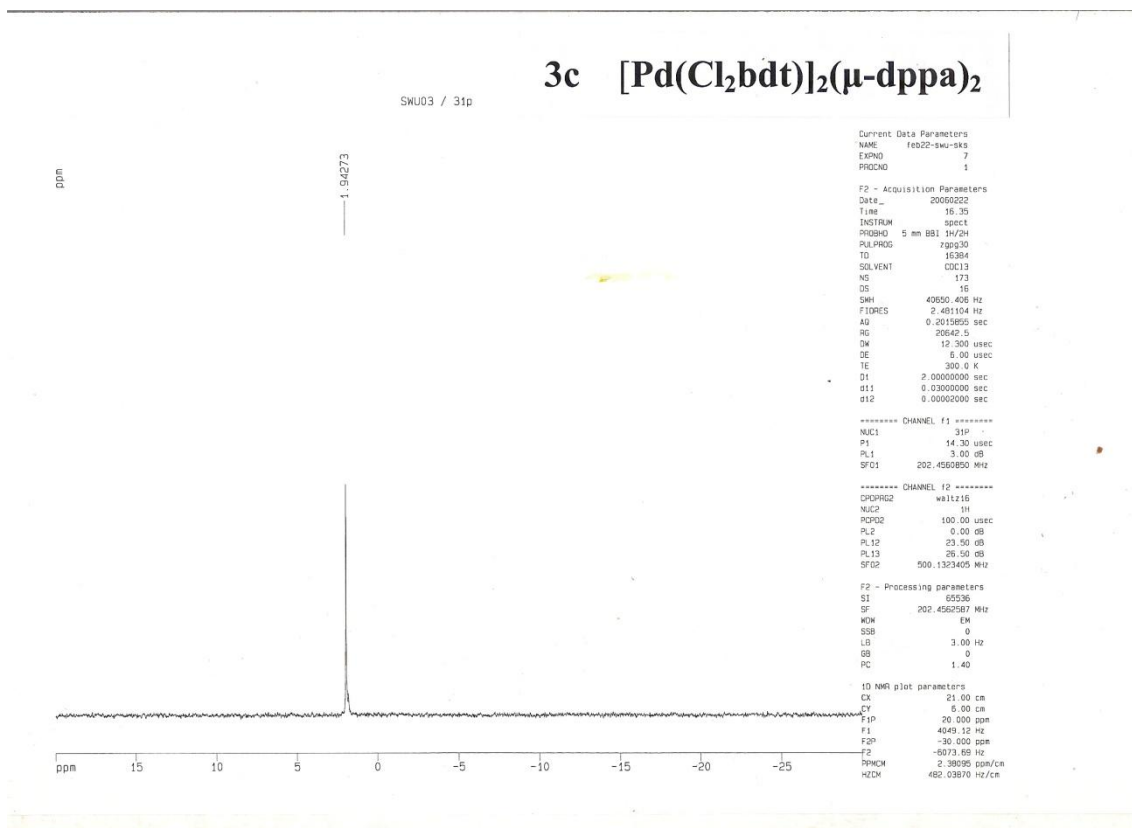

**Fig. S15**  $^{31}\text{P}$  NMR spectra of Pt(II) complexes (**2** and **4**).

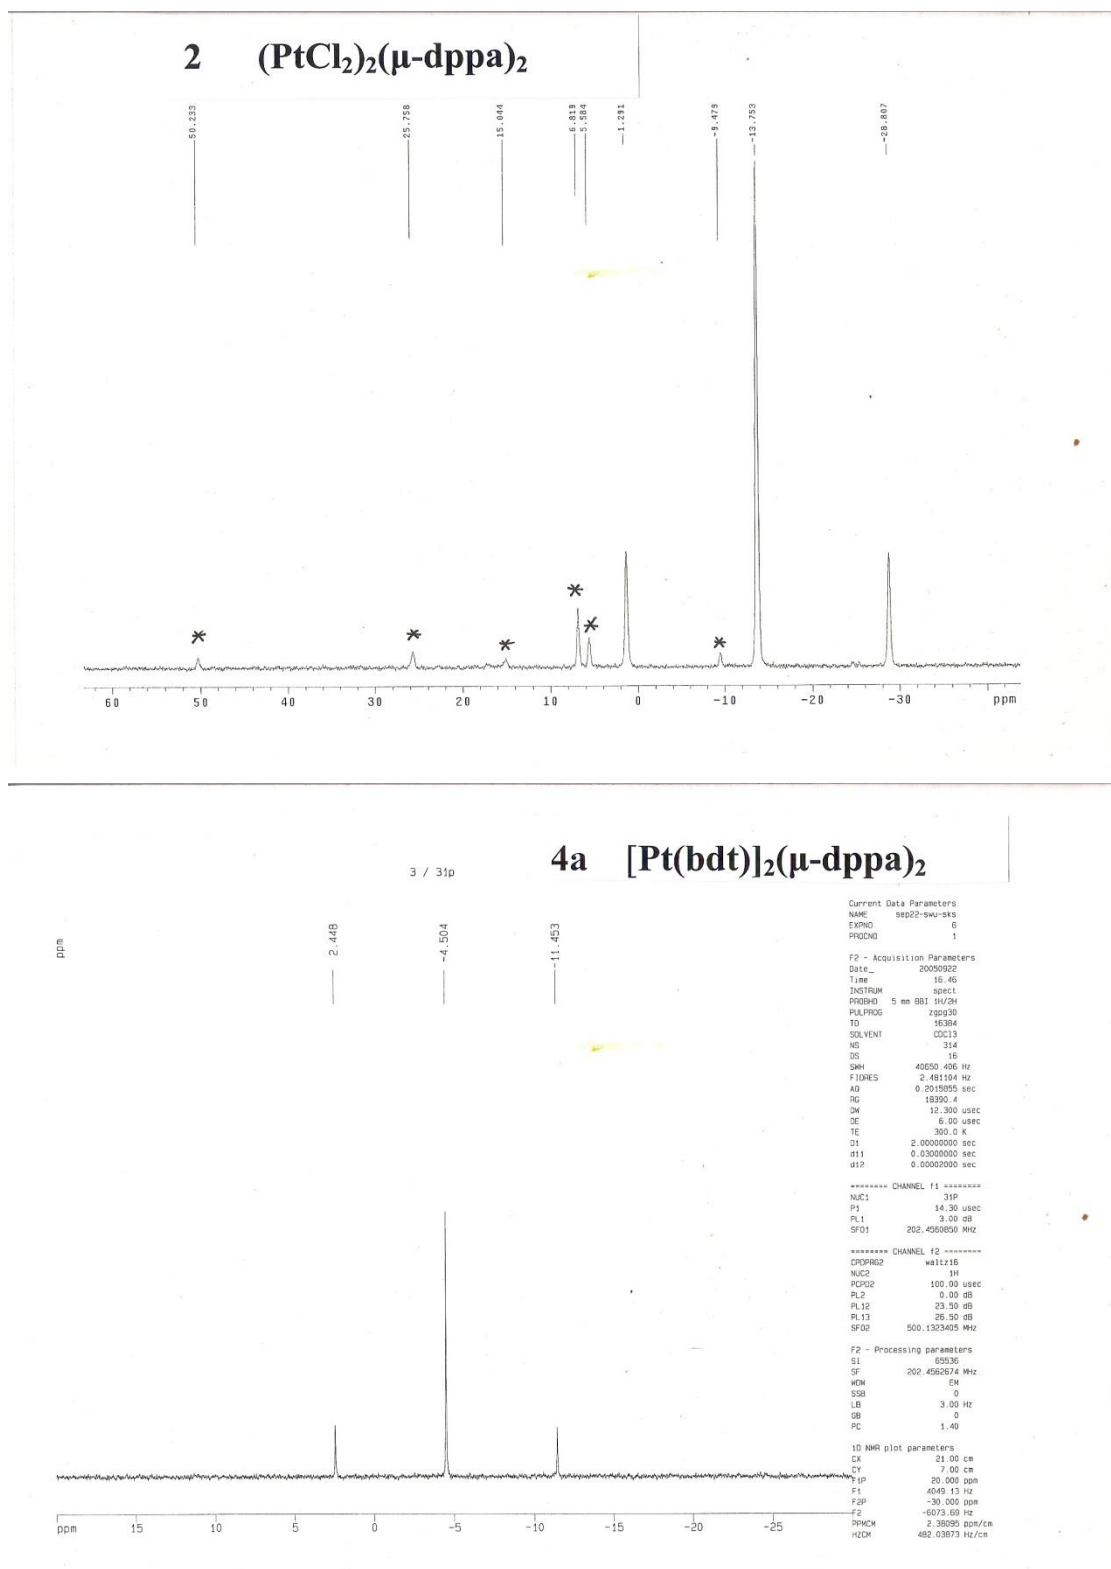

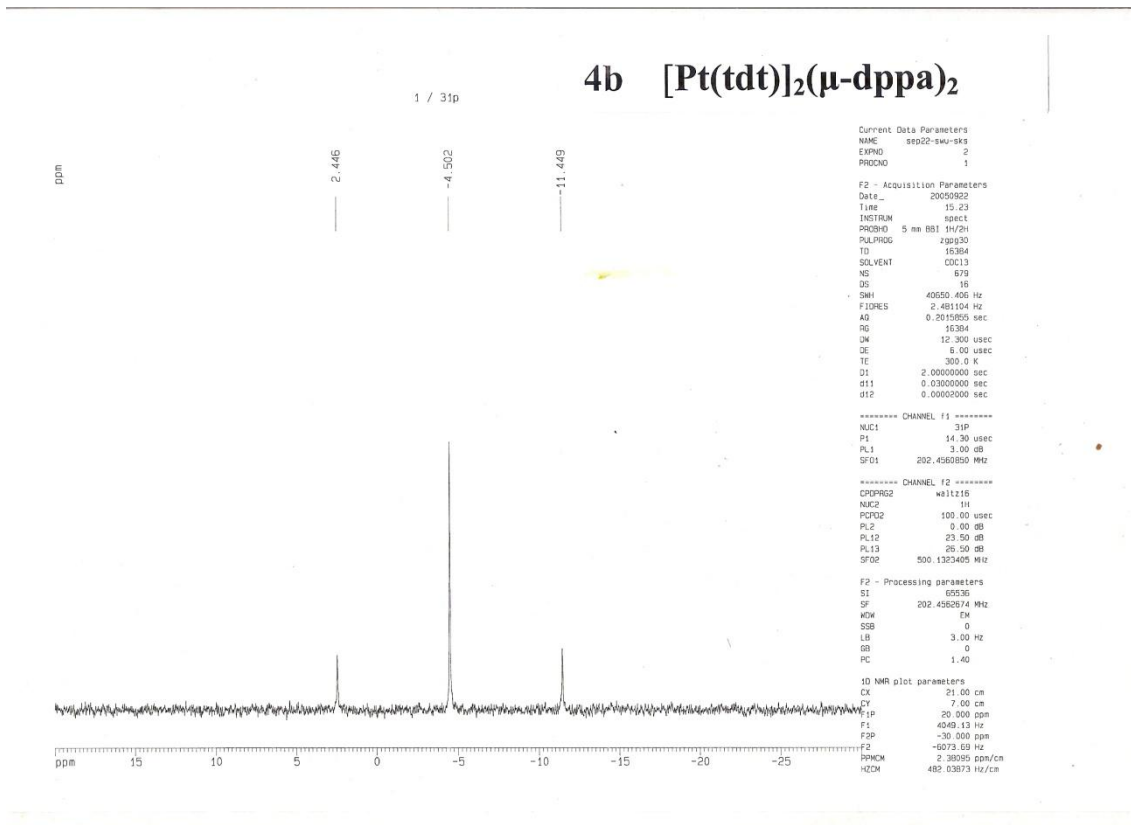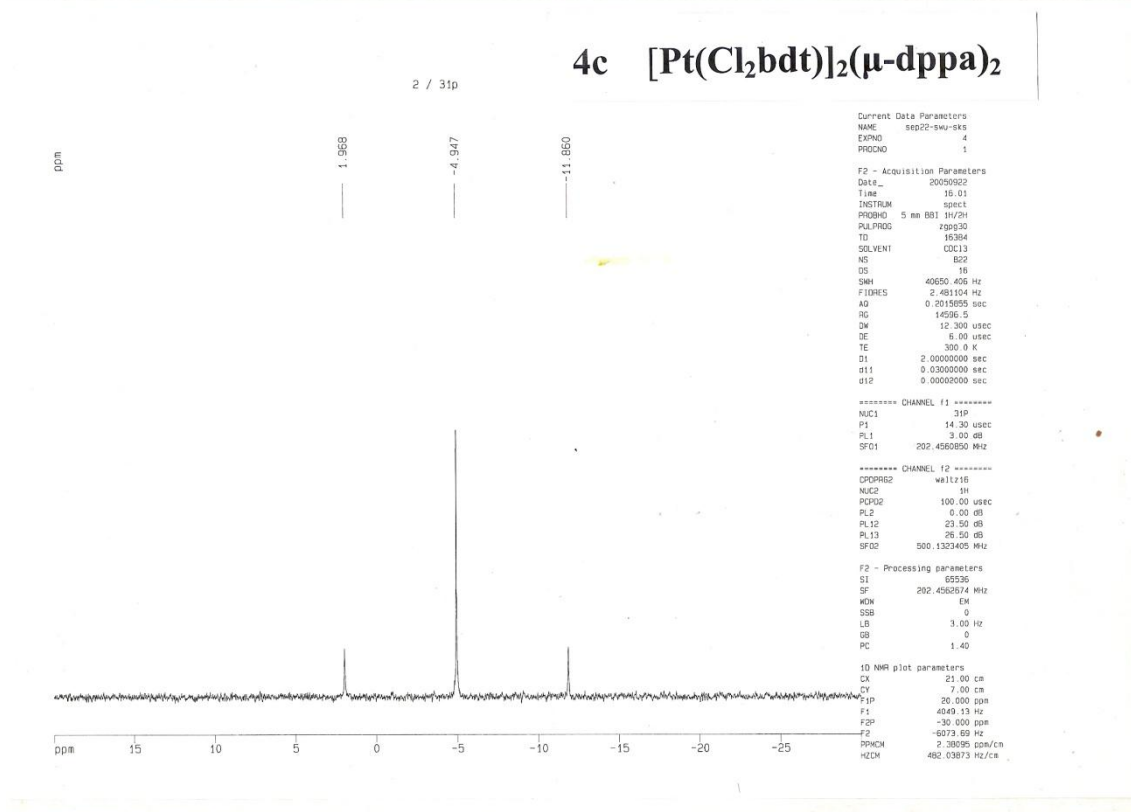

**Fig. S16**  $^{195}\text{Pt}$  NMR spectra of Pt(II) complexes (**2** and **4**).

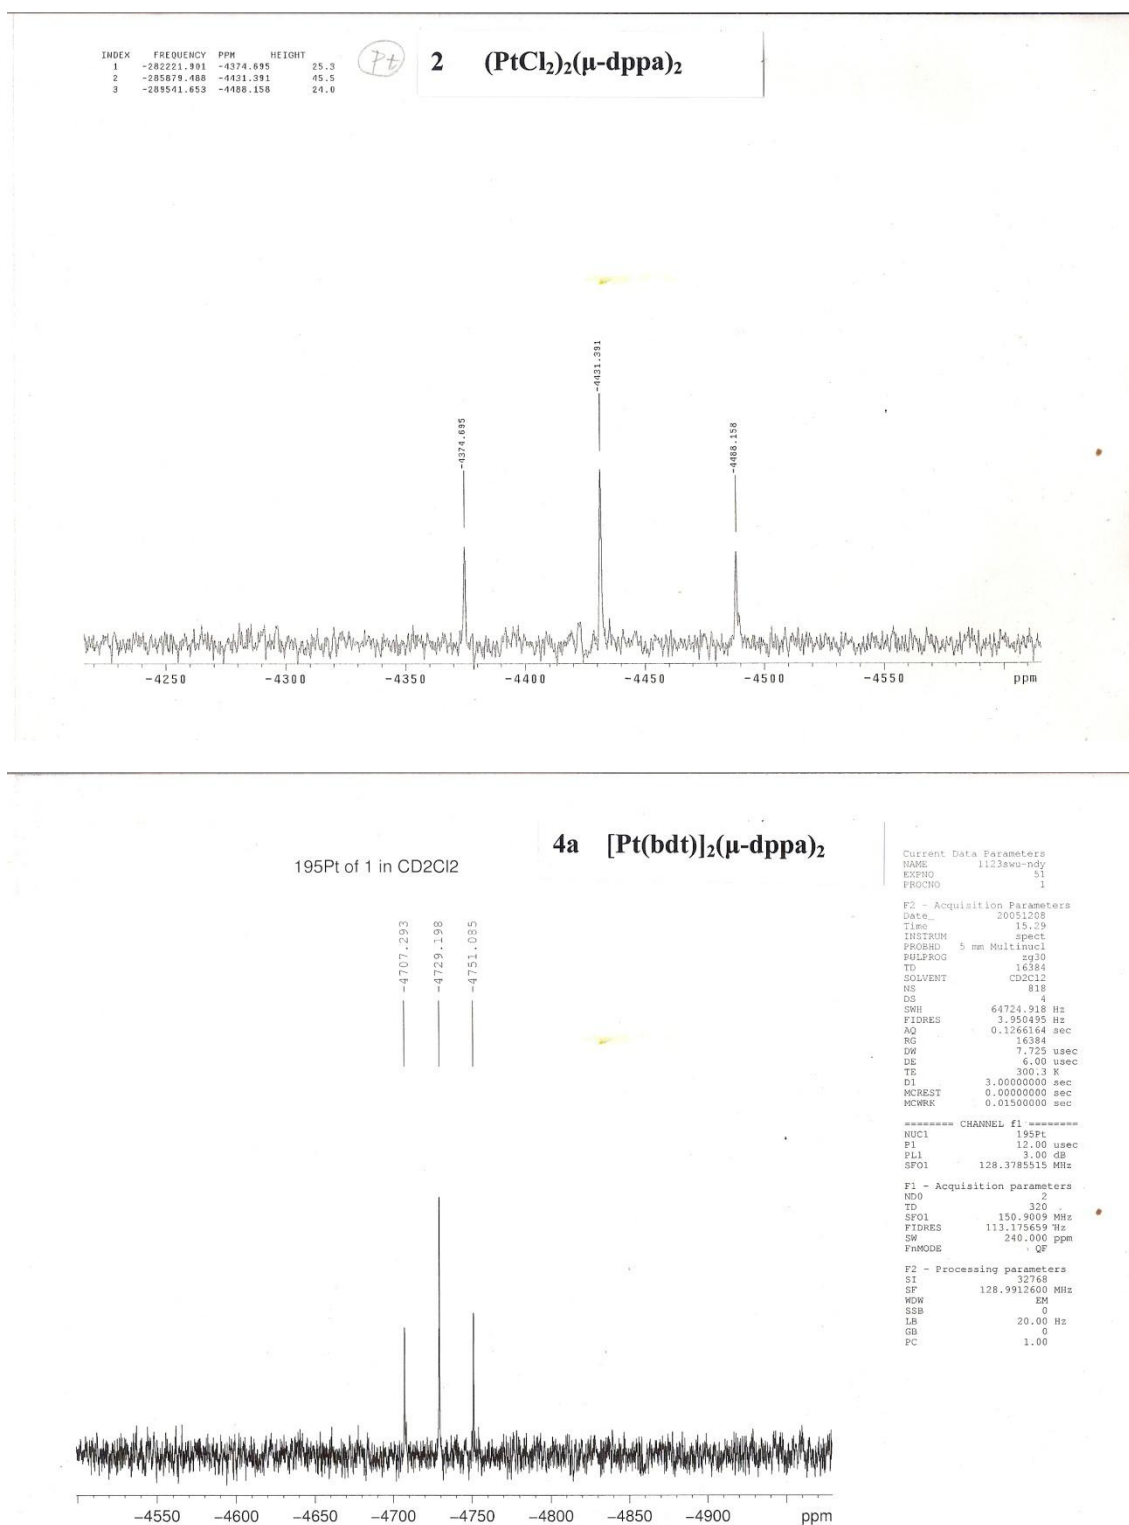

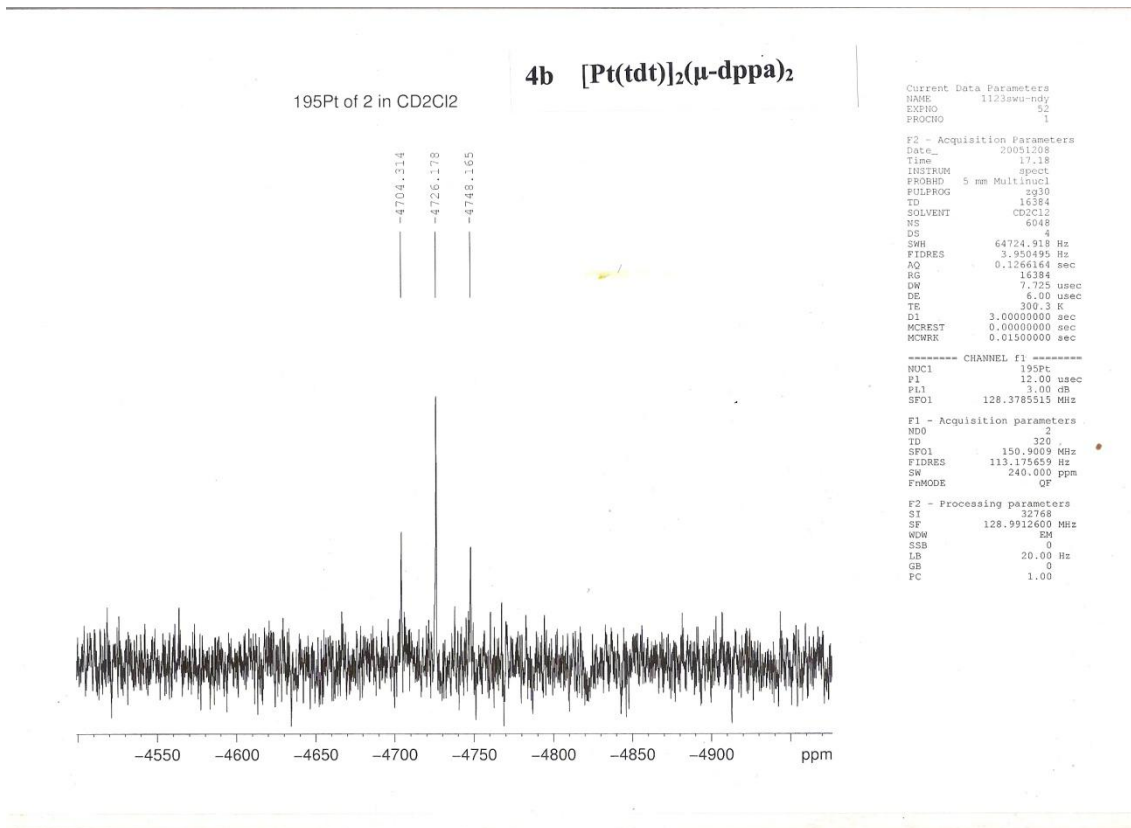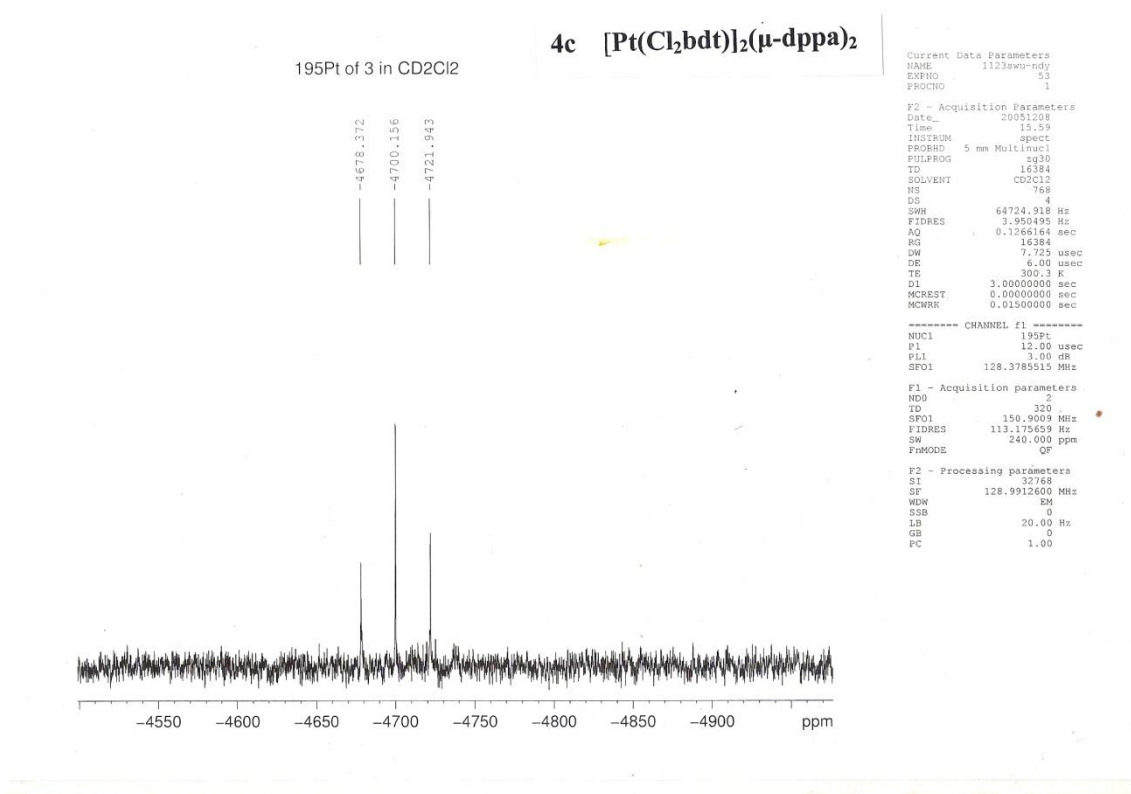

Supplement: b815013c.pdf [file b815013c.pdf]
